# Supplementary material for: FGDB: a comprehensive graph database of ligand fragments from the Protein Data Bank
Source: Oxford University Press journal article supplement (doi:10.1093/database/baac044), 2022-01-01
Supplement: baac044_supp.zip [file baac044_supp.zip]

Exported CSV files for all of the use cases are available at:

[http://www.computationalbiology.it/software/fgdb/export\\_fragments\\_CSV\\_files.zip](http://www.computationalbiology.it/software/fgdb/export_fragments_CSV_files.zip)
